# Supplementary material for: Effects of N-acetyl-L-cysteine on lifespan, locomotor activity and stress-resistance of 3 Drosophila species with different lifespans
Source: publisher site journal article supplement (doi:10.18632/aging.101561), 2018-09-20
Supplement: Supplementary file [file aging-v10i9-101561-supplementary-material-SD2.pdf]

## SUPPLEMENTARY TABLES

**Supplementary Table S1.** The effects of NAC on *D. melanogaster* lifespan parameters.

| Variant | Sex | M (days) | dM (%) | Log-Rank test (p) | Max (days) | dMax (%) | Wang-Allison test (p) | MRDT (days) | dMRD T (%) | n   |
|---------|-----|----------|--------|-------------------|------------|----------|-----------------------|-------------|------------|-----|
| control | ♂   | 54       |        |                   | 64         |          |                       | 6.9         |            | 535 |
| 10 nM   | ♂   | 57       | 5.6    | p < 0.05          | 67         | 4.7      | p < 0.01              | 7.2         | 4.3        | 306 |
| 100 nM  | ♂   | 59       | 9.3    | p < 0.0001        | 69         | 7.8      | p < 0.0001            | 6.9         | 0          | 296 |
| 1 μM    | ♂   | 58       | 7.4    | p < 0.001         | 67         | 4.7      | p < 0.01              | 7.8         | 13         | 297 |
| 10 μM   | ♂   | 56       | 3.7    | p > 0.05          | 68         | 6.2      | p < 0.01              | 8.3         | 20.3       | 299 |
| 100 μM  | ♂   | 57       | 5.6    | p < 0.001         | 71         | 10.9     | p < 0.0001            | 8.7         | 26.1       | 299 |
| 1 mM    | ♂   | 56       | 3.7    | p < 0.05          | 65         | 1.6      | p < 0.05              | 8.2         | 18.8       | 304 |
| 10 mM   | ♂   | 44       | -18.5  | p < 0.0001        | 61         | -4.7     | p > 0.05              | 6.5         | -5.8       | 271 |
| 100 mM  | ♂   | 51       | -5.6   | p < 0.001         | 61         | -4.7     | p > 0.05              | 6.1         | -11.6      | 269 |
| control | ♀   | 67       |        |                   | 78         |          |                       | 6.5         |            | 583 |
| 10 nM   | ♀   | 66       | -1.5   | p < 0.001         | 74         | -5.1     | p < 0.01              | 6           | -7.7       | 312 |
| 100 nM  | ♀   | 66       | -1.5   | p < 0.0001        | 74         | -5.1     | p < 0.0001            | 6.6         | 1.5        | 306 |
| 1 μM    | ♀   | 67       | 0      | p > 0.05          | 81         | 3.8      | p > 0.05              | 7.1         | 9.2        | 276 |
| 10 μM   | ♀   | 64       | -4.5   | p < 0.001         | 73         | -6.4     | p < 0.001             | 6.7         | 3.1        | 307 |
| 100 μM  | ♀   | 64       | -4.5   | p < 0.001         | 76         | -2.6     | p < 0.05              | 7.3         | 12.3       | 295 |
| 1 mM    | ♀   | 64       | -4.5   | p < 0.0001        | 73         | -6.4     | p < 0.0001            | 6.7         | 3.1        | 295 |
| 10 mM   | ♀   | 64       | -4.5   | p > 0.05          | 76         | -2.6     | p > 0.05              | 6.7         | 3.1        | 289 |
| 100 mM  | ♀   | 60       | -10.4  | p < 0.0001        | 71         | -9       | p < 0.0001            | 6.5         | 0          | 277 |

M - median lifespan; Max - maximum lifespan (age of 90% mortality); MRDT - mortality rate doubling time; dM, dMax, dMRDT - differences between median and maximum (age of 90% mortality) lifespan and MRDT of control and experimental flies, respectively; n - number of flies.

**Supplementary Table S2.** The effects of NAC on *D. virilis* lifespan parameters.

| Variant | Sex | M (days) | dM (%) | Log-Rank test (p) | Max (days) | dMax (%) | Wang-Allison test (p) | MRDT (days) | dMRDT (%) | n   |
|---------|-----|----------|--------|-------------------|------------|----------|-----------------------|-------------|-----------|-----|
| control | ♂   | 71       |        |                   | 105        |          |                       | 18.2        |           | 588 |
| 10 nM   | ♂   | 94       | 32.4   | p < .0001         | 114        | 8.6      | p < 0.0001            | 13.3        | -26.9     | 287 |
| 100 nM  | ♂   | 93       | 31     | p < .0001         | 114        | 8.69     | p < 0.0001            | 12          | -34.1     | 285 |
| 1 μM    | ♂   | 93       | 31     | p < .0001         | 113        | 7.6      | p < 0.0001            | 12.6        | -30.8     | 287 |
| 10 μM   | ♂   | 92       | 29.6   | p < .0001         | 113        | 7.6      | p < 0.0001            | 12.4        | -31.9     | 288 |
| 100 μM  | ♂   | 93       | 31     | p < .0001         | 113        | 7.6      | p < 0.0001            | 12.4        | -31.9     | 282 |
| 1 mM    | ♂   | 93       | 31     | p < .0001         | 108        | 2.9      | p > 0.05              | 12.2        | -33       | 293 |
| 10 mM   | ♂   | 65       | -8.5   | p < .0001         | 74         | -29.5    | p < 0.0001            | 12.8        | -29.7     | 328 |
| 100 mM  | ♂   | 50       | -29.6  | p < .0001         | 58         | -44.8    | p < 0.0001            | 9.9         | -45.6     | 276 |
| control |     | 75       |        |                   | 102        |          |                       | 14.7        |           | 640 |
| 10 nM   | ♀   | 92       | 22.6   | p < .0001         | 109        | 6.9      | p < 0.0001            | 10.2        | -30.6     | 314 |
| 100 nM  | ♀   | 89       | 18.7   | p < .0001         | 107        | 4.9      | p < 0.001             | 10.7        | -27.2     | 293 |
| 1 μM    | ♀   | 87       | 16     | p < .0001         | 109        | 6.9      | p < 0.01              | 10.2        | -30.6     | 330 |
| 10 μM   | ♀   | 92       | 22.7   | p < .0001         | 109        | 6.9      | p < 0.0001            | 10.7        | -27.2     | 299 |
| 100 μM  | ♀   | 94.5     | 26     | p < .0001         | 112        | 9.8      | p < 0.0001            | 10.2        | -30.6     | 320 |
| 1 mM    | ♀   | 93       | 24     | p < .0001         | 111        | 8.8      | p < 0.0001            | 9.4         | -36.1     | 287 |
| 10 mM   | ♀   | 67       | -10.7  | p < .0001         | 90         | -11.8    | p < 0.0001            | 14.4        | -2        | 445 |
| 100 mM  | ♀   | 45       | -40    | p < .0001         | 54         | -47.1    | p < 0.0001            | 6.4         | -56.5     | 438 |

M - median lifespan; Max - maximum lifespan (age of 90% mortality); MRDT - mortality rate doubling time; dM, dMax, dMRDT - differences between median and maximum (age of 90% mortality) lifespan and MRDT of control and experimental flies, respectively; n - number of flies.

**Supplementary Table S3.** The effects of NAC on *D. kikkawai* lifespan parameters.

| Variant | Sex | M (days) | dM (%) | Log-Rank test (p) | Max (days) | dMax (%) | Wang-Allison test (p) | MRDT (days) | dMRD T (%) | n   |
|---------|-----|----------|--------|-------------------|------------|----------|-----------------------|-------------|------------|-----|
| control | ♂   | 25       |        |                   | 36         |          |                       | 7.5         |            | 538 |
| 10 nM   | ♂   | 27       | 8      | p < 0.0001        | 43         | 19.4     | p < 0.0001            | 8.4         | 12         | 298 |
| 100 nM  | ♂   | 28       | 12     | p < 0.0001        | 39         | 8.3      | p < 0.01              | 7.1         | -5.3       | 292 |
| 1 μM    | ♂   | 29       | 16     | p < 0.0001        | 40         | 11.1     | p < 0.0001            | 7.5         | 0          | 285 |
| 10 μM   | ♂   | 29       | 16     | p < 0.01          | 36         | 0        | p > 0.05              | 6.4         | -14.7      | 299 |
| 100 μM  | ♂   | 29       | 16     | p < 0.0001        | 41         | 13.9     | p < 0.0001            | 7.9         | 5.3        | 312 |
| 1 mM    | ♂   | 29       | 16     | p < 0.0001        | 41         | 13.9     | p < 0.0001            | 7.4         | -1.3       | 292 |
| 10 mM   | ♂   | 16       | -36    | p < 0.0001        | 28         | -22.2    | p < 0.0001            | 10.2        | 36         | 293 |
| 100 mM  | ♂   | 22       | -12    | p < 0.0001        | 30         | -16.7    | p < 0.0001            | 5.9         | -21.3      | 296 |
| control | ♀   | 39       |        |                   | 51         |          |                       | 7.9         |            | 641 |
| 10 nM   | ♀   | 41       | 5.1    | p < 0.05          | 51         | 0        | p > 0.05              | 6.4         | -19        | 293 |
| 100 nM  | ♀   | 41       | 5.1    | p < 0.05          | 50         | -2       | p > 0.05              | 7.4         | -6.3       | 295 |
| 1 μM    | ♀   | 41       | 5.1    | p > 0.05          | 51         | 0        | p > 0.05              | 6.5         | -17.7      | 297 |
| 10 μM   | ♀   | 39       | 0      | p > 0.05          | 50         | -2       | p > 0.05              | 7.6         | -3.8       | 299 |
| 100 μM  | ♀   | 40.5     | 3.8    | p > 0.05          | 48         | -5.9     | p < 0.01              | 6.8         | -13.9      | 290 |
| 1 mM    | ♀   | 40       | 2.6    | p > 0.05          | 51         | 0        | p > 0.05              | 7.1         | -10.1      | 311 |
| 10 mM   | ♀   | 35       | -10.3  | p > 0.05          | 55         | 7.8      | p < 0.05              | 10.3        | 30.4       | 296 |
| 100 mM  | ♀   | 34       | -12.8  | p < 0.0001        | 50         | -2       | p > 0.05              | 9.6         | 21.5       | 288 |

M - median lifespan; Max - maximum lifespan (age of 90% mortality); MRDT - mortality rate doubling time; dM, dMax, dMRDT - differences between median and maximum (age of 90% mortality) lifespan and MRDT of control and experimental flies, respectively; n - number of flies.

**Supplementary Table S4.** Influence of NAC treatment on *D. melanogaster* resistance to paraquat, starvation and hyperthermia (see Full Text version).

**Supplementary Table S5.** Influence of NAC treatment on *D. virilis* resistance to paraquat, starvation and hyperthermia (see Full Text version).

**Supplementary Table S6.** Influence of NAC treatment on *D. kikkawai* resistance to paraquat, starvation and hyperthermia (see Full Text version).

**Supplementary Table S7.** Relative antioxidant and H<sub>2</sub>S biosynthesis gene expression levels normalized to control in *D. melanogaster*.

| variant | <i>Cat/CG6871</i> |      | <i>Sod1/CG11793</i> |       | <i>Cbs/CG1753</i> |      | <i>Eip55E/CG5345</i> |       | <i>Nfs1/CG12264</i> |      |
|---------|-------------------|------|---------------------|-------|-------------------|------|----------------------|-------|---------------------|------|
|         | ♂                 | ♀    | ♂                   | ♀     | ♂                 | ♀    | ♂                    | ♀     | ♂                   | ♀    |
| control | 1.0               | 1.0  | 1.0                 | 1.0   | 1.0               | 1.0  | 1.0                  | 1.0   | 1.0                 | 1.0  |
| 10 nM   | 1.4**             | 0.2* | 1.1                 | 0.6*  | 2.0*              | 1.1  | 0.5*                 | 0.4*  | 3.0*                | 0.8* |
| 100 nM  | 1.5**             | 0.3* | 1.0                 | 0.9   | 1.3               | 1.1  | 0.6*                 | 0.4*  | 1.2*                | 0.5* |
| 1 μM    | 0.8*              | 0.4* | 1.1                 | 0.6*  | 2.6*              | 0.7  | 1.8*                 | 0.5*  | 5.6**               | 0.8* |
| 10 μM   | 0.5*              | 0.3* | 0.7*                | 0.5*  | 0.4*              | 0.6  | 0.2***               | 0.7*  | 0.5*                | 0.7* |
| 100 μM  | 5.8**             | 0.5* | 1.7**               | 0.5*  | 5.3**             | 1.4* | 0.5**                | 2.9** | 0.8*                | 2.1* |
| 1 mM    | 6.3**             | 0.3* | 2.8**               | 0.4** | 2.3*              | 0.4* | 0.3***               | 1.9*  | 0.8*                | 2.1* |
| 10 mM   | 1.7*              | 0.5* | 1.2*                | 0.4** | 1.5*              | 0.6  | 4.9***               | 0.4*  | 15.0***             | 0.5* |
| 100 mM  | 7.0**             | 0.6* | 1.6**               | 0.7*  | 1.6*              | 0.7  | 0.03***              | 0.1*  | 3.6**               | 0.6* |

\*p<0.05, \*\*p<0.01, \*\*\*p<0.001

**Supplementary Table S8.** List of primers for qRT-PCR.

| Gene                                                            | Forward                            | Reverse                                |
|-----------------------------------------------------------------|------------------------------------|----------------------------------------|
| <i>β-Tubulin</i>                                                | 5'-GGCCAACCTGAACGCTGATCT -3'       | 5'-AAGCCGGGCATGAAGAAGTG-3'             |
| <i>Catalase</i><br>( <i>Cat/CG6871</i> )                        | 5'-<br>CCCAAGAACTACTTTGCTGAGGTG-3' | 5'-<br>AGGAGAACAGACGACCATGCAG-<br>3'   |
| <i>Superoxide dismutase 1</i><br>( <i>Sod1/CG11793</i> )        | 5'-TGCACGAGTTCGGTGACAACAC-3'       | 5'-<br>TCCTTGCCATACGGATTGAAGTG<br>C-3' |
| <i>Cystathionine β-synthase</i><br>( <i>Cbs/CG1753</i> )        | 5'-AGATTACGCCCAACATCCTC-3'         | 5'-CTCGCACTTGGCATAACATCT-3'            |
| <i>Ecdysone-induced protein 55E</i><br>( <i>Eip55E/CG5345</i> ) | 5'-GTGTGGATCGAGTCACCAAC-3'         | 5'-GGAGGTCAGGAAGGTGTTGT-3'             |
| <i>Nfs1 cysteine desulfurase</i><br>( <i>Nfs1/CG12264</i> )     | 5'-CTTTCTTTGCGTGAGATGGA-3'         | 5'-GTATGTGGCTTTGGCATCAC-3'             |
