# Supplementary material for: Effects of N-acetyl-L-cysteine on lifespan, locomotor activity and stress-resistance of 3 Drosophila species with different lifespans
Source: Aging (Albany NY). 2018 Sep 20;10(9):2428–58. doi: 10.18632/aging.101561 (PMC6188487; doi:10.18632/aging.101561)
Supplement: Supplementary Table S4 [file aging-10-101561-s003.xlsx]

## Sheet: D. melanogaster
Supplementary Table S4. Influence of NAC treatment on D. melanogaster resistance to paraquat, starvation and hyperthermia
										Survival (%) at time (h)
			12	ϕ-Fisher	dS	24	ϕ-Fisher	dS	36	ϕ-Fisher	dS	48	ϕ-Fisher	dS	60	ϕ-Fisher	dS	72	ϕ-Fisher	dS	84	ϕ-Fisher	dS	96	ϕ-Fisher	dS	108	ϕ-Fisher	dS	120	ϕ-Fisher	dS	132	ϕ-Fisher	dS	144	ϕ-Fisher	dS	156	ϕ-Fisher	dS	N	n
concentration	sex	stress factor
control	males	paraquat	98.4±0.6			83.5±1.9			60.1±2.5			23.9±2.2			7.6±1.4			1.8±0.7			1±0.5			0.3±0.3			0±0															3	381
10 nM	males	paraquat	99.2±0.4	p>0.05	0.8	75.3±2.2	p<0.01	-8.1	44.9±2.5	p<0.01	-15.2	18.2±2	p<0.05	-5.7	3.9±1	p>0.05	-3.7	1.6±0.6	p>0.05	-0.3	0.3±0.3	p>0.05	-0.8	0±0	p>0.05	-0.3	0±0	p>0.05	0	0												3	385
100 nM	males	paraquat	99.4±0.4	p>0.05	1	79±2.2	p>0.05	-4.5	46.8±2.7	p<0.01	-13.3	20.4±2.2	p>0.05	-3.5	5.7±1.3	p>0.05	-1.9	1.5±0.7	p>0.05	-0.3	0.3±0.3	p>0.05	-0.7	0.3±0.3	p>0.05	0	0±0	p>0.05	0	0												3	333
1 µM	males	paraquat	98.7±0.6	p>0.05	0.3	80.1±2	p>0.05	-3.4	58±2.5	p>0.05	-2.1	24.1±2.2	p>0.05	0.2	7±1.3	p>0.05	-0.6	3.1±0.9	p>0.05	2018-03-01	0.5±0.4	p>0.05	-0.5	0±0	p>0.05	-0.3	0±0	p>0.05	0	0.7												3	386
10 µM	males	paraquat	100±0	p>0.05	2018-06-01	90±1.5	p<0.01	2018-06-06	66.2±2.3	p>0.05	2018-01-06	29.2±2.2	p>0.05	2018-03-05	10.5±1.5	p>0.05	2018-09-02	2.9±0.8	p>0.05	2018-01-01	0.5±0.3	p>0.05	-0.6	0.2±0.2	p>0.05	0	0±0	p>0.05	0	0.5												3	411
100 µM	males	paraquat	99.7±0.3	p>0.05	2018-03-01	76.7±2.2	p<0.01	-6.8	45.3±2.6	p<0.01	-14.8	13.6±1.8	p<0.01	-10.3	3.5±1	p>0.05	-4.1	1.4±0.6	p>0.05	-0.5	0±0	p<0.01	-1	0±0	p>0.05	-0.3	0±0	p>0.05	0	0.8												3	369
1 mM	males	paraquat	98.9±0.5	p>0.05	0.5	73.1±2.3	p<0.01	-10.3	47.3±2.6	p>0.05	-12.8	21.8±2.1	p>0.05	-2.1	7.3±1.3	p>0.05	-0.4	2.2±0.8	p>0.05	0.3	1.3±0.6	p>0.05	0.3	0±0	p>0.05	-0.3	0±0	p>0.05	0	-0.7												3	372
10 mM	males	paraquat	99.7±0.3	p>0.05	2018-03-01	78.6±2.1	p>0.05	-4.8	53.8±2.6	p>0.05	-6.3	20±2.1	p>0.05	-3.9	6.5±1.3	p>0.05	-1.1	2.2±0.8	p>0.05	0.3	0.3±0.3	p>0.05	-0.8	0±0	p>0.05	-0.3	0±0	p>0.05	0	-0.3												3	370
100 mM	males	paraquat	99.2±0.5	p>0.05	0.8	70.4±2.4	p<0.01	-13.1	32.6±2.4	p<0.01	-27.5	7.5±1.4	p<0.01	-16.3	2.2±0.8	p<0.01	-5.5	0.3±0.3	p>0.05	-1.6	0±0	p<0.01	-1	0±0	p>0.05	-0.3	0±0	p>0.05	0	0.5												3	371
control	females	paraquat	100±0			70.3±2.3			48.9±2.5			25.6±2.2			18.2±1.9			9.1±1.4			7.9±1.3			2.2±0.7			1.7±0.6	p>0.05		0.7±0.4			0.2±0.2			0±0						3	407
10 nM	females	paraquat	100±0	p>0.05	0	72.7±2.2	p>0.05	2018-04-02	53.4±2.5	p>0.05	2018-06-04	32±2.3	p<0.05	2018-05-06	26.8±2.2	p<0.01	2018-07-08	19.5±2	p<0.01	2018-04-10	11.8±1.6	p<0.05	4	4.4±1	p<0.05	2018-02-02	2.5±0.8	p>0.05	0.7	0.7±0.4	p>0.05	0	0.2±0.2	p>0.05	0	0±0	p>0.05	0				3	406
100 nM	females	paraquat	100±0	p>0.05	0	71.5±2.2	p>0.05	2018-02-01	45.5±2.5	p>0.05	-3.4	26.3±2.2	p>0.05	0.7	18.4±1.9	p>0.05	0.2	10.8±1.5	p>0.05	2018-07-01	9.1±1.4	p>0.05	2018-02-01	4.9±1.1	p<0.05	2018-07-02	3.7±0.9	p>0.05	2	0.7±0.4	p>0.05	0	0±0	p>0.05	-0.2	0±0	p>0.05	0				3	407
1 µM	females	paraquat	100±0	p>0.05	0	78.8±2	p<0.01	2018-06-08	62±2.4	p<0.01	2018-01-13	36.5±2.4	p<0.01	11	30.3±2.3	p<0.01	2018-01-12	18±1.9	p<0.01	2018-09-08	12.7±1.6	p<0.01	2018-09-04	4.3±1	p>0.05	2018-01-02	2.6±0.8	p>0.05	0.9	1.4±0.6	p>0.05	0.7	0.2±0.2	p>0.05	0	0±0	p>0.05	0				3	416
10 µM	females	paraquat	99.5±0.4	p>0.05	-0.5	67.7±2.3	p>0.05	-2.6	47.8±2.5	p>0.05	-1.1	23.9±2.1	p>0.05	-1.7	19.4±2	p>0.05	2018-02-01	12.4±1.6	p>0.05	2018-03-03	9.2±1.4	p>0.05	2018-03-01	5.5±1.1	p>0.05	2018-03-03	3.5±0.9	p>0.05	2018-08-01	1.2±0.6	p>0.05	0.5	0±0	p>0.05	-0.2	0±0	p>0.05	0				3	402
100 µM	females	paraquat	100±0	p>0.05	0	65.1±2.4	p>0.05	-5.2	40.9±2.5	p<0.05	-7.9	21±2.1	p>0.05	-4.6	16.5±1.9	p>0.05	-1.6	10.5±1.6	p>0.05	2018-04-01	8.7±1.4	p>0.05	0.8	3.9±1	p>0.05	2018-07-01	2.9±0.9	p>0.05	2018-02-01	1.6±0.6	p>0.05	0.8	1±0.5	p>0.05	0.8	0±0	p>0.05	0				3	381
1 mM	females	paraquat	99.5±0.3	p<0.05	-0.5	66±2.3	p>0.05	-4.3	44.3±2.5	p>0.05	-4.6	26.2±2.2	p>0.05	0.6	17.4±1.9	p>0.05	-0.8	8.8±1.4	p>0.05	-0.3	6.4±1.2	p>0.05	-1.5	2.7±0.8	p>0.05	0.5	1±0.5	p>0.05	-0.7	0±0	p>0.05	-0.7	0±0	p>0.05	-0.2	0±0	p>0.05	0				3	409
10 mM	females	paraquat	99.8±0.2	p>0.05	-0.2	62±2.4	p<0.01	-8.2	38±2.4	p<0.01	-10.9	19.1±1.9	p<0.05	-6.4	14.4±1.7	p>0.05	-3.8	8.7±1.4	p>0.05	-0.4	6.4±1.2	p>0.05	-1.5	3.5±0.9	p>0.05	2018-03-01	1.4±0.6	p>0.05	-0.3	0.5±0.3	p>0.05	-0.3	0±0	p>0.05	-0.2	0±0	p>0.05	0				3	424
100 mM	females	paraquat	100±0	p>0.05	0	57.3±2.5	p<0.01	-13	36.8±2.4	p<0.01	-12.1	18±1.9	p<0.01	-7.6	14.3±1.7	p>0.05	-3.9	10±1.5	p>0.05	0.9	8.3±1.4	p>0.05	0.4	4±1	p>0.05	2018-08-01	3.3±0.9	p>0.05	2018-05-01	1.3±0.6	p>0.05	0.5	0.8±0.4	p>0.05	0.5	0±0	p>0.05	0				3	400
control	males	starvation	100±0			86.4±1.6			52.6±2.4			25.2±2.1			7.7±1.3			3.6±0.9			0±0			0±0			0±0															3	441
10 nM	males	starvation	99.5±0.3	p<0.05	-0.5	84.7±1.7	p>0.05	-1.7	52.6±2.4	p>0.05	0	18.5±1.9	p<0.01	-6.6	3±0.8	p<0.01	-4.7	0.7±0.4	p>0.05	-2.9	0.2±0.2	p>0.05	0.2	0±0	p>0.05	0	0±0	p>0.05														3	437
100 nM	males	starvation	99.5±0.3	p<0.05	-0.5	89.4±1.5	p>0.05	3	55.3±2.4	p>0.05	2018-07-02	23.6±2.1	p>0.05	-1.5	7.6±1.3	p>0.05	-0.1	1.7±0.6	p>0.05	-2	0.2±0.2	p>0.05	0.2	0.2±0.2	p>0.05	0.2	0±0	p>0.05														3	423
1 µM	males	starvation	99.3±0.4	p<0.05	-0.7	90.7±1.4	p>0.05	2018-03-04	60.7±2.4	p<0.01	2018-01-08	23.5±2	p>0.05	-1.7	5.6±1.1	p>0.05	-2.1	0.9±0.5	p<0.01	-2.7	0±0	p>0.05	0	0±0	p>0.05	0	0±0	p>0.05														3	430
10 µM	males	starvation	98.8±0.5	p<0.05	-1.2	84.1±1.8	p>0.05	-2.2	62.5±2.3	p<0.01	2018-09-09	24.5±2.1	p>0.05	-0.7	3.5±0.9	p<0.01	-4.2	1.2±0.5	p<0.01	-2.5	0±0	p>0.05	0	0±0	p>0.05	0	0±0	p>0.05														3	429
100 µM	males	starvation	98.8±0.5	p<0.05	-1.2	90.2±1.5	p>0.05	2018-08-03	59.3±2.4	p>0.05	2018-07-06	22.1±2.1	p>0.05	-3.1	3.2±0.9	p<0.01	-4.5	0.2±0.2	p<0.01	-3.4	0±0	p>0.05	0	0±0	p>0.05	0	0±0	p>0.05														3	408
1 mM	males	starvation	98.6±0.6	p<0.05	-1.4	84.3±1.8	p>0.05	-2.1	52±2.4	p>0.05	-0.6	21.1±2	p>0.05	-4	2.4±0.7	p<0.01	-5.3	0.7±0.4	p<0.01	-2.9	0±0	p>0.05	0	0±0	p>0.05	0	0±0	p>0.05														3	421
10 mM	males	starvation	98.3±0.6	p<0.05	-1.7	84.7±1.8	p>0.05	-1.6	56.4±2.4	p>0.05	2018-08-03	27.1±2.2	p>0.05	2018-09-01	9.4±1.4	p>0.05	2018-07-01	4.4±1	p>0.05	0.7	0.5±0.3	p>0.05	0.5	0±0	p>0.05	0	0±0	p>0.05														3	413
100 mM	males	starvation	98.1±0.7	p<0.05	-1.9	72.8±2.2	p<0.01	-13.6	39.2±2.4	p<0.01	-13.4	26.5±2.1	p>0.05	2018-03-01	7.6±1.3	p>0.05	-0.1	2.8±0.8	p>0.05	-0.8	0.5±0.3	p>0.05	0.5	0±0	p>0.05	0	0±0	p>0.05														3	423
control	females	starvation	100±0			89.7±1.4			73.3±2.1			43.1±2.4			29.8±2.2			23±2			14.4±1.7			9.1±1.4			3.9±0.9			3±0.8			0.2±0.2			0.2±0.2			0±0			3	439
10 nM	females	starvation	100±0	p>0.05	0	95.5±1	p<0.01	2018-07-05	85.2±1.7	p<0.01	2018-09-11	58.2±2.4	p<0.01	2018-01-15	43.6±2.4	p<0.01	2018-08-13	29.3±2.2	p<0.05	2018-03-06	18.4±1.8	p>0.05	2018-01-04	14.1±1.7	p<0.01	5	6.4±1.2	p>0.05	2018-05-02	3.6±0.9	p>0.05	0.7	0.9±0.5	p>0.05	0.7	0.5±0.3	p>0.05	0.2	0±0	p>0.05	0	3	440
100 nM	females	starvation	100±0	p>0.05	0	92.2±1.3	p>0.05	2018-04-02	80±1.9	p>0.05	2018-07-06	56.8±2.4	p<0.01	2018-07-13	44.6±2.4	p<0.01	2018-08-14	29.9±2.2	p<0.05	2018-09-06	22.8±2	p<0.01	2018-04-08	17.5±1.8	p<0.05	2018-04-08	7.4±1.3	p>0.05	2018-05-03	5.5±1.1	p>0.05	2018-06-02	1.1±0.5	p>0.05	0.9	0.9±0.5	p>0.05	0.7	0±0	p>0.05	0	3	435
1 µM	females	starvation	100±0	p>0.05	0	86±1.7	p<0.05	-3.7	75.9±2	p>0.05	2018-06-02	51.4±2.4	p<0.01	2018-03-08	40.1±2.3	p<0.01	2018-03-10	29.4±2.2	p<0.05	2018-04-06	20.6±1.9	p<0.01	2018-03-06	13.8±1.6	p<0.05	2018-06-04	4.1±1	p>0.05	0.3	2.8±0.8	p>0.05	-0.2	0.7±0.4	p>0.05	0.5	0.7±0.4	p>0.05	0.5	0±0	p>0.05	0	3	436
10 µM	females	starvation	100±0	p>0.05	0	90.5±1.4	p>0.05	0.7	75±2	p>0.05	2018-07-01	47.3±2.3	p>0.05	2018-03-04	37.4±2.3	p<0.01	2018-05-07	29.9±2.2	p<0.01	2018-09-06	25±2	p<0.01	2018-06-10	12.2±1.5	p>0.05	2018-01-03	8.6±1.3	p<0.01	2018-08-04	2.4±0.7	p>0.05	-0.5	1.5±0.6	p>0.05	2018-03-01	0.9±0.4	p>0.05	0.7	0±0	p>0.05	0	3	452
100 µM	females	starvation	100±0	p>0.05	0	92.6±1.2	p>0.05	2018-09-02	81.9±1.8	p<0.01	2018-06-08	52.9±2.4	p<0.01	2018-08-09	40±2.3	p<0.01	2018-01-10	27.2±2.1	p>0.05	2018-02-04	15.8±1.7	p>0.05	2018-05-01	10.5±1.4	p>0.05	2018-04-01	3.8±0.9	p>0.05	-0.1	2.9±0.8	p>0.05	-0.1	1.1±0.5	p>0.05	0.9	1.1±0.5	p>0.05	0.9	0±0	p>0.05	0	3	448
1 mM	females	starvation	100±0	p>0.05	0	90.6±1.4	p>0.05	0.8	74.7±2.1	p>0.05	2018-03-01	46±2.4	p>0.05	2018-09-02	35.4±2.3	p<0.05	2018-06-05	27.6±2.1	p>0.05	2018-06-04	15.7±1.7	p>0.05	2018-03-01	11.2±1.5	p>0.05	2018-01-02	4.5±1	p>0.05	0.6	2.9±0.8	p>0.05	0	1.6±0.6	p>0.05	2018-03-01	1.6±0.6	p>0.05	2018-03-01	0±0	p>0.05	0	3	446
10 mM	females	starvation	100±0	p>0.05	0	93.3±1.2	p<0.05	2018-06-03	83.7±1.8	p<0.01	2018-04-10	60.3±2.3	p<0.01	2018-03-17	48.4±2.4	p<0.01	2018-06-18	32.8±2.2	p<0.01	2018-08-09	21.6±2	p<0.01	2018-02-07	14.2±1.7	p<0.01	2018-01-05	5.7±1.1	p>0.05	2018-09-01	4.4±1	p>0.05	2018-04-01	2.8±0.8	p>0.05	2018-05-02	2.3±0.7	p>0.05	2018-01-02	0±0	p>0.05	0	3	436
100 mM	females	starvation	100±0	p>0.05	0	90.9±1.4	p>0.05	2018-02-01	75.3±2.1	p>0.05	2018-09-01	44.4±2.4	p>0.05	2018-04-01	33.8±2.3	p>0.05	2018-09-03	25.4±2.1	p>0.05	2018-04-02	17±1.8	p>0.05	2018-07-02	10.2±1.4	p>0.05	2018-01-01	5±1	p>0.05	2018-01-01	3.9±0.9	p>0.05	0.9	1.8±0.6	p>0.05	2018-06-01	1.8±0.6	p>0.05	2018-06-01	0±0	p>0.05	0	3	441
control	males	hyperthermia	100±0			100±0			95.1±1.1			81±2			50.8±2.5			37.9±2.5			16.7±1.9			8.7±1.4			6.4±1.2			3.8±1			3.3±0.9			0±0						3	390
10 nM	males	hyperthermia	99.5±0.3	p>0.05	-0.5	99.5±0.3	p>0.05	-0.5	98±0.7	p<0.01	2018-09-02	93.1±1.3	p<0.01	2018-01-12	57.6±2.4	p<0.05	2018-08-06	39.7±2.4	p>0.05	2018-08-01	20.6±2	p>0.05	2018-09-03	10.8±1.5	p>0.05	2018-01-02	6.6±1.2	p>0.05	0.2	2.5±0.8	p>0.05	-1.4	1.7±0.6	p>0.05	-1.6	0±0	p>0.05	0				3	408
100 nM	males	hyperthermia	100±0	p>0.05	0	100±0	p>0.05	0	95.8±1	p>0.05	0.7	80±2	p>0.05	-1	53±2.5	p>0.05	2018-02-02	41.9±2.4	p>0.05	2018-09-03	24.9±2.1	p<0.01	2018-02-08	10.8±1.5	p>0.05	2018-01-02	8.1±1.4	p>0.05	2018-07-01	4.9±1.1	p>0.05	2018-01-01	3.7±0.9	p>0.05	0.4	0±0	p>0.05	0				3	406
1 µM	males	hyperthermia	100±0	p>0.05	0	100±0	p>0.05	0	96.8±0.9	p>0.05	2018-07-01	85.6±1.8	p>0.05	2018-06-04	47.5±2.6	p>0.05	-3.3	34.4±2.5	p>0.05	-3.5	19.7±2.1	p>0.05	2018-01-03	5.1±1.1	p>0.05	-3.7	0.3±0.3	p<0.01	-6.1	0.3±0.3	p<0.01	-3.6	0.3±0.3	p<0.01	-3.1	0±0	p>0.05	0				3	375
10 µM	males	hyperthermia	100±0	p>0.05	0	100±0	p>0.05	0	96.8±0.9	p>0.05	2018-06-01	79.2±2.1	p>0.05	-1.8	45.8±2.6	p>0.05	-4.9	34.8±2.5	p>0.05	-3.2	20.5±2.1	p>0.05	2018-08-03	9.2±1.5	p>0.05	0.4	8.1±1.4	p>0.05	2018-07-01	3±0.9	p>0.05	-0.9	2.7±0.8	p>0.05	-0.6	0±0	p>0.05	0				3	371
100 µM	males	hyperthermia	100±0	p>0.05	0	100±0	p>0.05	0	96.3±1	p>0.05	2018-01-01	85.4±1.9	p>0.05	2018-04-04	49.3±2.7	p>0.05	-1.5	37.5±2.6	p>0.05	-0.4	14.9±1.9	p>0.05	-1.8	7.2±1.4	p>0.05	-1.6	4±1.1	p>0.05	-2.4	1.1±0.6	p<0.01	-2.7	0.9±0.5	p<0.01	-2.5	0±0	p>0.05	0				3	349
1 mM	males	hyperthermia	100±0	p>0.05	0	100±0	p>0.05	0	97.4±0.8	p>0.05	2018-03-02	86.5±1.7	p>0.05	2018-05-05	50.5±2.5	p>0.05	-0.3	28.8±2.3	p<0.01	-9.2	13.5±1.7	p>0.05	-3.2	4.1±1	p<0.01	-4.6	0.8±0.4	p<0.01	-5.6	0.3±0.3	p<0.01	-3.6	0±0	p<0.01	-3.3	0±0	p>0.05	0				3	386
10 mM	males	hyperthermia	100±0	p>0.05	0	100±0	p>0.05	0	95.9±1	p>0.05	0.8	84.2±1.9	p>0.05	2018-01-03	57.7±2.6	p<0.01	2018-09-06	39.9±2.6	p>0.05	2018-09-01	19.7±2.1	p>0.05	3	7.4±1.4	p>0.05	-1.3	0.8±0.5	p<0.01	-5.6	0±0	p<0.01	-3.8	0±0	p<0.01	-3.3	0±0	p>0.05	0				3	366
100 mM	males	hyperthermia	100±0	p>0.05	0	99.7±0.3	p>0.05	-0.3	96±1	p>0.05	0.9	84.1±1.9	p>0.05	2018-01-03	53.5±2.7	p>0.05	2018-08-02	30.6±2.5	p>0.05	-7.4	10.8±1.6	p<0.01	-5.9	2.3±0.8	p<0.01	-6.5	0±0	p<0.01	-6.4	0±0	p<0.01	-3.8	0±0	p<0.01	-3.3	0±0	p>0.05	0				3	353
control	females	hyperthermia	100±0			100±0			98.4±0.7			95.1±1.1			69.1±2.4			50.3±2.6			19.7±2.1			2.2±0.8			1.4±0.6			0.3±0.3			0.3±0.3			0±0						3	366
10 nM	females	hyperthermia	100±0	p>0.05	0	100±0	p>0.05	0	98.7±0.6	p>0.05	0.3	94.7±1.1	p>0.05	-0.4	69.4±2.4	p>0.05	0.3	45.4±2.6	p>0.05	-4.9	17.2±1.9	p>0.05	-2.5	2.4±0.8	p>0.05	0.2	1.6±0.6	p>0.05	0.2	0.8±0.5	p>0.05	0.5	0.3±0.3	p>0.05	0	0±0	p>0.05	0				3	379
100 nM	females	hyperthermia	100±0	p>0.05	0	100±0	p>0.05	0	100±0	p>0.05	2018-06-01	97.9±0.7	p>0.05	2018-08-02	76.5±2.2	p>0.05	2018-04-07	52±2.6	p>0.05	2018-07-01	22.2±2.1	p>0.05	2018-05-02	1±0.5	p>0.05	-1.1	0.5±0.4	p>0.05	-0.8	0.3±0.3	p>0.05	0	0±0	p>0.05	-0.3	0±0	p>0.05	0				3	383
1 µM	females	hyperthermia	100±0	p>0.05	0	99.5±0.4	p>0.05	-0.5	98.9±0.5	p>0.05	0.6	95±1.1	p>0.05	-0.1	64.2±2.5	p>0.05	-4.9	44.8±2.6	p>0.05	-5.4	22.8±2.2	p>0.05	2018-01-03	2.7±0.8	p>0.05	0.5	1.9±0.7	p>0.05	0.5	0.8±0.5	p>0.05	0.5	0.5±0.4	p>0.05	0.3	0±0	p>0.05	0				3	377
10 µM	females	hyperthermia	100±0	p>0.05	0	99.7±0.3	p>0.05	-0.3	99.1±0.5	p>0.05	0.8	98±0.8	p>0.05	2018-09-02	73.3±2.4	p>0.05	2018-02-04	43.8±2.7	p>0.05	-6.5	15.7±2	p>0.05	-4	0.6±0.4	p>0.05	-1.6	0±0	p>0.05	-1.4	0±0	p>0.05	-0.3	0±0	p>0.05	-0.3	0±0	p>0.05	0				3	345
100 µM	females	hyperthermia	100±0	p>0.05	0	100±0	p>0.05	0	99.4±0.4	p>0.05	2018-01-01	96.9±0.9	p>0.05	2018-08-01	71.4±2.4	p>0.05	2018-03-02	43.1±2.6	p>0.05	-7.2	13.3±1.8	p<0.01	-6.4	2.8±0.9	p>0.05	0.6	2.8±0.9	p>0.05	2018-05-01	2±0.7	p>0.05	2018-07-01	1.1±0.6	p>0.05	0.9	0±0	p>0.05	0				3	353
1 mM	females	hyperthermia	100±0	p>0.05	0	100±0	p>0.05	0	99.7±0.3	p>0.05	2018-04-01	96.3±1	p>0.05	2018-02-01	78.4±2.2	p<0.01	2018-03-09	53.4±2.7	p>0.05	2018-01-03	15.9±1.9	p>0.05	-3.8	1.1±0.6	p>0.05	-1	0±0	p>0.05	-1.4	0±0	p>0.05	-0.3	0±0	p>0.05	-0.3	0±0	p>0.05	0				3	352
10 mM	females	hyperthermia	100±0	p>0.05	0	100±0	p>0.05	0	99.2±0.5	p>0.05	0.8	97.4±0.8	p>0.05	2018-03-02	80.4±2	p<0.01	2018-03-11	52.1±2.6	p>0.05	2018-08-01	26.7±2.3	p<0.01	7	3.2±0.9	p>0.05	1	2.1±0.7	p>0.05	0.8	0.5±0.4	p>0.05	0.3	0±0	p>0.05	-0.3	0±0	p>0.05	0				3	378
100 mM	females	hyperthermia	100±0	p>0.05	0	100±0	p>0.05	0	99.4±0.4	p>0.05	2018-01-01	99.1±0.5	p<0.01	4	90.1±1.6	p<0.01	21	70.1±2.5	p<0.01	2018-09-19	34.2±2.6	p<0.01	2018-05-14	15.1±1.9	p<0.01	2018-09-12	13.6±1.8	p<0.01	2018-03-12	5.8±1.3	p<0.01	2018-05-05	3.2±0.9	p<0.01	2018-09-02	0±0	p>0.05	0				3	345
			dS - differences between survival of control and experimental flies
			N - number of replications
			n - number of flies
