# Supplementary material for: Effects of N-acetyl-L-cysteine on lifespan, locomotor activity and stress-resistance of 3 Drosophila species with different lifespans
Source: Aging (Albany NY). 2018 Sep 20;10(9):2428–58. doi: 10.18632/aging.101561 (PMC6188487; doi:10.18632/aging.101561)
Supplement: Supplementary Table S5 [file aging-10-101561-s004.xlsx]

## Sheet: D. virilis
Supplementary Table S5. Influence of NAC treatment on D. virilis resistance to paraquat, starvation and hyperthermia
										Survival (%) at time (h)
			12	ϕ-Fisher	dS	24	ϕ-Fisher	dS	36	ϕ-Fisher	dS	48	ϕ-Fisher	dS	60	ϕ-Fisher	dS	72	ϕ-Fisher	dS	84	ϕ-Fisher	dS	96	ϕ-Fisher	dS	108	ϕ-Fisher	dS	120	ϕ-Fisher	dS	132	ϕ-Fisher	dS	144	ϕ-Fisher	dS	156	ϕ-Fisher	dS	168	ϕ-Fisher	dS	180	ϕ-Fisher	dS	192	ϕ-Fisher
concentration	sex	stress factor
control	males	paraquat	98.6±0.6			92.8±1.4			74±2.3			64.1±2.5			52.5±2.6			38.1±2.6			33.1±2.5			26±2.3			20.2±2.1			15.2±1.9			12.7±1.8			5.5±1.2			3.9±1			1.7±0.7			1.4±0.6			1.1±0.5
10 nM	males	paraquat	99.5±0.4	p>0.05	0.8	91.6±1.4	p<0.05	-1.2	76.4±2.2	p>0.05	2018-03-02	68.5±2.4	p>0.05	2018-04-04	59.2±2.6	p>0.05	2018-08-06	42.4±2.6	p>0.05	2018-03-04	36.4±2.5	p>0.05	2018-03-03	26.9±2.3	p>0.05	0.9	21.7±2.2	p>0.05	2018-06-01	16±1.9	p>0.05	0.8	14.1±1.8	p>0.05	2018-04-01	9.8±1.5	p>0.05	2018-03-04	7.3±1.4	p>0.05	2018-05-03	1.6±0.7	p>0.05	0	1.6±0.7	p>0.05	0.2	0.8±0.5	p>0.05
100 nM	males	paraquat	99.4±0.4	p>0.05	0.8	93.6±1.3	p>0.05	0.8	76.2±2.2	p>0.05	2018-01-02	65.4±2.5	p>0.05	2018-03-01	59.6±2.6	p>0.05	2018-01-07	43.2±2.6	p>0.05	2018-01-05	35.5±2.5	p>0.05	2018-03-02	24.7±2.3	p>0.05	-1.3	19.4±2.1	p>0.05	-0.8	15.2±1.9	p>0.05	0	13.6±1.8	p>0.05	0.9	9.1±1.5	p>0.05	2018-06-03	7.5±1.4	p>0.05	2018-06-03	2.5±0.8	p>0.05	0.8	2.2±0.8	p>0.05	0.8	1.1±0.6	p>0.05
1 µM	males	paraquat	98.3±0.7	p>0.05	-0.3	89.4±1.7	p>0.05	-3.4	74.7±2.3	p>0.05	0.7	66.1±2.5	p>0.05	2	58.3±2.6	p>0.05	2018-08-05	39.9±2.6	p>0.05	2018-08-01	34.2±2.5	p>0.05	1	27±2.4	p>0.05	1	19.8±2.1	p>0.05	-0.3	15.8±2	p>0.05	0.6	14.4±1.9	p>0.05	2018-07-01	9.2±1.5	p>0.05	2018-07-03	8±1.5	p>0.05	2018-02-04	2.6±0.9	p>0.05	0.9	2±0.8	p>0.05	0.6	0.3±0.3	p>0.05
10 µM	males	paraquat	98.4±0.7	p>0.05	-0.2	93.2±1.3	p>0.05	0.4	80±2.1	p>0.05	6	70±2.4	p>0.05	2018-09-05	59.7±2.5	p>0.05	2018-02-07	45.1±2.6	p>0.05	7	34.3±2.5	p>0.05	2018-02-01	24.3±2.2	p>0.05	-1.6	18.9±2	p>0.05	-1.2	16.5±1.9	p>0.05	2018-03-01	14.3±1.8	p>0.05	2018-06-01	8.6±1.5	p>0.05	2018-01-03	6.2±1.3	p>0.05	2018-03-02	4.1±1	p>0.05	2018-04-02	2.7±0.8	p>0.05	2018-03-01	0.8±0.5	p>0.05
100 µM	males	paraquat	99.4±0.5	p>0.05	0.7	93.9±1.4	p>0.05	2018-01-01	77.7±2.4	p>0.05	2018-07-03	69.7±2.6	p>0.05	2018-06-05	65.8±2.7	p<0.01	2018-03-13	48.7±2.8	p<0.01	2018-06-10	40.3±2.8	p>0.05	2018-02-07	28.7±2.6	p>0.05	2018-07-02	23.9±2.4	p>0.05	2018-07-03	18.1±2.2	p>0.05	2018-09-02	12.9±1.9	p>0.05	0.2	7.4±1.5	p>0.05	2018-09-01	5.5±1.3	p>0.05	2018-06-01	3.2±1	p>0.05	2018-06-01	2.6±0.9	p>0.05	2018-02-01	0.6±0.5	p>0.05
1 mM	males	paraquat	98.3±0.7	p>0.05	-0.3	94.7±1.3	p>0.05	2018-09-01	81.1±2.3	p>0.05	2018-01-07	74.8±2.5	p<0.01	2018-07-10	62.9±2.8	p<0.01	2018-04-10	47±2.9	p<0.01	2018-09-08	40.7±2.8	p>0.05	2018-06-07	30.8±2.7	p>0.05	2018-08-04	24.2±2.5	p>0.05	4	17.2±2.2	p>0.05	2	14.6±2	p>0.05	2018-09-01	8.6±1.6	p>0.05	2018-01-03	7.6±1.5	p>0.05	2018-07-03	4±1.1	p>0.05	2018-03-02	1.3±0.7	p>0.05	-0.1	0.7±0.5	p>0.05
10 mM	males	paraquat	97.1±0.9	p>0.05	-1.5	90.4±1.7	p>0.05	-2.4	83.1±2.1	p>0.05	2018-01-09	71.3±2.6	p>0.05	2018-02-07	56.4±2.8	p>0.05	2018-09-03	42±2.8	p>0.05	2018-09-03	38.5±2.7	p>0.05	2018-04-05	29.9±2.6	p>0.05	4	19.7±2.2	p>0.05	-0.4	13.7±1.9	p>0.05	-1.5	9.6±1.7	p>0.05	-3.2	4.1±1.1	p>0.05	-1.4	2.2±0.8	p>0.05	-1.6	1±0.5	p>0.05	-0.7	0.3±0.3	p>0.05	-1.1	0.3±0.3	p>0.05
100 mM	males	paraquat	98.7±0.6	p>0.05	0.1	93.3±1.4	p>0.05	0.5	81.3±2.2	p>0.05	2018-02-07	70.2±2.6	p>0.05	2018-01-06	59.4±2.8	p>0.05	2018-09-06	42.5±2.8	p>0.05	2018-04-04	37.5±2.7	p>0.05	2018-03-04	31.7±2.6	p>0.05	2018-08-05	22.9±2.4	p>0.05	2018-07-02	19±2.2	p>0.05	2018-09-03	14.3±2	p>0.05	2018-06-01	5.1±1.2	p>0.05	-0.4	3.2±1	p>0.05	-0.7	1.3±0.6	p>0.05	-0.4	0.6±0.4	p>0.05	-0.7	0±0	p>0.05
control	females	paraquat	98±0.7			87±1.7			73.8±2.2			65.9±2.3			57.8±2.4			42.2±2.4			35.8±2.4			27.5±2.2			19.9±2			14±1.7			10.5±1.5			7.1±1.3			5.6±1.1			3.4±0.9			2±0.7			1.2±0.5
10 nM	females	paraquat	98.5±0.6	p>0.05	0.5	90.7±1.4	p>0.05	2018-07-03	74.4±2.2	p>0.05	0.7	67.1±2.3	p>0.05	2018-01-01	54.5±2.5	p>0.05	-3.3	37.3±2.4	p>0.05	-4.8	29.5±2.3	p>0.05	-6.3	25.8±2.2	p>0.05	-1.7	18.2±1.9	p>0.05	-1.7	14.5±1.7	p>0.05	0.5	11.8±1.6	p>0.05	2018-03-01	10.1±1.5	p>0.05	3	7.1±1.3	p>0.05	2018-05-01	4.4±1	p>0.05	1	2.5±0.8	p>0.05	0.5	1.2±0.5	p>0.05
100 nM	females	paraquat	98.3±0.7	p>0.05	0.2	92.5±1.3	p<0.01	2018-05-05	77.1±2.1	p>0.05	2018-03-03	68.1±2.3	p>0.05	2018-01-02	59.1±2.5	p>0.05	2018-03-01	39.2±2.4	p>0.05	2018-08-01	32.4±2.3	p>0.05	-3.4	23.7±2.1	p>0.05	-3.8	20.2±2	p>0.05	0.3	13.2±1.7	p>0.05	-0.8	11.5±1.6	p>0.05	0.9	7.2±1.3	p>0.05	0.1	6.5±1.2	p>0.05	0.8	4.2±1	p>0.05	0.8	3.2±0.9	p>0.05	2018-03-01	1±0.5	p>0.05
1 µM	females	paraquat	97.2±0.8	p>0.05	-0.8	87.8±1.6	p>0.05	0.8	73.8±2.1	p>0.05	0	69.1±2.2	p>0.05	2018-02-03	62.8±2.3	p>0.05	2018-09-04	48.2±2.4	p>0.05	2018-01-09	38.6±2.4	p>0.05	2018-09-02	25.3±2.1	p>0.05	-2.2	19.2±1.9	p>0.05	-0.6	12.9±1.6	p>0.05	-1.1	10.1±1.5	p>0.05	-0.5	5.9±1.1	p>0.05	-1.3	4.9±1	p>0.05	-0.7	2.8±0.8	p>0.05	-0.6	1.6±0.6	p>0.05	-0.3	1.4±0.6	p>0.05
10 µM	females	paraquat	98.6±0.6	p>0.05	0.5	91.2±1.4	p>0.05	2018-02-04	75.8±2.1	p>0.05	2018-01-02	69.4±2.2	p>0.05	2018-05-03	61.8±2.4	p>0.05	4	42.9±2.4	p>0.05	-5.4	34.4±2.3	p>0.05	-1.4	25.4±2.1	p>0.05	-2.1	16.8±1.8	p>0.05	-3	13.3±1.7	p>0.05	-0.7	12.1±1.6	p>0.05	2018-05-01	5.7±1.1	p>0.05	-1.4	5.2±1.1	p>0.05	-0.4	2.4±0.7	p>0.05	-1.1	2.1±0.7	p>0.05	0.2	1.4±0.6	p>0.05
100 µM	females	paraquat	98.3±0.6	p>0.05	0.3	94.1±1.1	p<0.01	2018-01-07	76.7±2.1	p>0.05	2018-09-02	68.6±2.3	p>0.05	2018-07-02	63.7±2.3	p>0.05	2018-08-05	49.3±2.4	p>0.05	2018-04-06	40.6±2.4	p>0.05	2018-08-04	25.5±2.1	p>0.05	-2	17±1.8	p>0.05	-2.9	12±1.6	p>0.05	-1.9	9±1.4	p>0.05	-1.6	5.9±1.1	p>0.05	-1.2	4.5±1	p>0.05	-1.2	3.1±0.8	p>0.05	-0.4	2.1±0.7	p>0.05	0.2	0.5±0.3	p>0.05
1 mM	females	paraquat	98.7±0.6	p>0.05	0.6	94.5±1.2	p<0.01	2018-05-07	83.9±1.9	p<0.01	2018-02-10	75±2.2	p<0.01	2018-01-09	64.5±2.5	p<0.05	2018-06-06	48.4±2.6	p<0.05	-0.9	42.4±2.5	p<0.05	2018-06-06	26.6±2.3	p>0.05	-0.9	19.5±2	p>0.05	-0.4	14.5±1.8	p>0.05	0.5	10.8±1.6	p>0.05	0.3	7.1±1.3	p>0.05	0	5.3±1.1	p>0.05	-0.4	2.9±0.9	p>0.05	-0.5	1.8±0.7	p>0.05	-0.1	1.3±0.6	p>0.05
10 mM	females	paraquat	98.7±0.6	p>0.05	0.6	92.9±1.3	p<0.01	2018-08-05	79.9±2.1	p<0.05	2018-01-06	73.8±2.3	p<0.01	2018-09-07	66.9±2.4	p<0.01	2018-01-09	43.4±2.5	p>0.05	-5	33.3±2.4	p>0.05	-2.5	24.9±2.2	p>0.05	-2.6	18±2	p>0.05	-1.9	10.8±1.6	p>0.05	-3.1	7.4±1.3	p>0.05	-3.1	5.6±1.2	p>0.05	-1.6	4.5±1.1	p>0.05	-1.1	2.6±0.8	p>0.05	-0.8	2.1±0.7	p>0.05	0.2	1.6±0.6	p>0.05
100 mM	females	paraquat	99.2±0.4	p>0.05	2018-02-01	93.8±1.2	p<0.01	2018-08-06	81.6±2	p<0.01	2018-08-07	72.5±2.3	p<0.05	2018-05-06	62.3±2.5	p>0.05	2018-05-04	47.5±2.5	p>0.05	2018-01-04	34.3±2.4	p>0.05	-1.5	24.7±2.2	p>0.05	-2.8	13.2±1.7	p<0.01	-6.6	10.4±1.6	p>0.05	-3.6	7.8±1.4	p>0.05	-2.7	4.9±1.1	p>0.05	-2.2	4.4±1	p>0.05	-1.2	2.9±0.8	p>0.05	-0.6	2.3±0.8	p>0.05	0.4	1.6±0.6	p>0.05
control	males	starvation	100±0			98.7±0.6			97.4±0.8			76.2±2.2			62.8±2.5			50±2.6			29.1±2.3			23±2.2			18.1±2			6.8±1.3			1.3±0.6			0±0
10 nM	males	starvation	100±0	p>0.05	0	98.2±0.8	p>0.05	-0.5	92.1±1.6	p<0.01	-5.2	69.3±2.8	p>0.05	-6.9	51.8±3	p<0.01	-11	35.4±2.9	p<0.01	-14.6	9.3±1.7	p<0.01	-19.8	4.3±1.2	p<0.01	-18.8	0.4±0.4	p<0.01	-17.7	0.4±0.4	p<0.01	-6.4	0±0	p>0.05	-1.3	0±0	p>0.05	0
100 nM	males	starvation	100±0	p>0.05	0	98.6±0.7	p>0.05	-0.1	95.1±1.3	p>0.05	-2.3	75.3±2.6	p>0.05	-0.9	58.7±2.9	p>0.05	-4.2	41±2.9	p<0.01	-9	15.2±2.1	p<0.01	-13.9	5.7±1.4	p<0.01	-17.4	2.1±0.9	p<0.01	-15.9	0.4±0.4	p<0.01	-6.5	0±0	p>0.05	-1.3	0±0	p>0.05	0
1 µM	males	starvation	100±0	p>0.05	0	99.3±0.5	p>0.05	0.6	96±1.2	p>0.05	-1.4	77.6±2.5	p>0.05	2018-04-01	64.6±2.9	p>0.05	2018-08-01	47.7±3	p>0.05	-2.3	19.1±2.4	p<0.01	-9.9	10.8±1.9	p<0.01	-12.2	2.2±0.9	p<0.01	-15.9	1.4±0.7	p<0.01	-5.4	0.7±0.5	p>0.05	-0.6	0±0	p>0.05	0
10 µM	males	starvation	100±0	p>0.05	0	99.3±0.5	p>0.05	0.6	95.7±1.2	p>0.05	-1.7	72±2.7	p>0.05	-4.1	60.2±2.9	p>0.05	-2.6	40.5±2.9	p<0.01	-9.5	13.3±2	p<0.01	-15.8	6.8±1.5	p<0.01	-16.2	1.8±0.8	p<0.01	-16.3	0.4±0.4	p<0.01	-6.4	0±0	p>0.05	-1.3	0±0	p>0.05	0
100 µM	males	starvation	100±0	p>0.05	0	97.5±0.9	p>0.05	-1.2	91.3±1.7	p<0.01	-6	71.1±2.7	p>0.05	-5.1	64.6±2.9	p>0.05	2018-08-01	56±3	p>0.05	6	34.7±2.9	p>0.05	2018-06-05	23.8±2.6	p>0.05	0.8	7.6±1.6	p<0.01	-10.5	2.9±1	p<0.01	-3.9	1.8±0.8	p>0.05	0.5	0±0	p>0.05	0
1 mM	males	starvation	100±0	p>0.05	0	97.6±1	p>0.05	-1.1	94.7±1.4	p>0.05	-2.7	76.8±2.7	p>0.05	0.7	65.9±3	p>0.05	3	45.9±3.2	p>0.05	-4.1	19.1±2.5	p<0.01	-10	12.2±2.1	p<0.01	-10.8	3.3±1.1	p<0.01	-14.8	2.8±1.1	p<0.01	-4	1.6±0.8	p>0.05	0.3	0±0	p>0.05	0
10 mM	males	starvation	100±0	p>0.05	0	98.6±0.6	p>0.05	-0.1	94.4±1.1	p>0.05	-3	77.8±2	p>0.05	2018-06-01	66.7±2.3	p>0.05	2018-09-03	54.6±2.4	p>0.05	2018-06-04	36.3±2.3	p<0.01	2018-02-07	29±2.2	p>0.05	6	23.7±2.1	p>0.05	2018-06-05	8.7±1.4	p>0.05	2018-09-01	1.2±0.5	p>0.05	-0.1	0±0	p>0.05	0
100 mM	males	starvation	100±0	p>0.05	0	98.2±0.7	p>0.05	-0.5	95.1±1.1	p>0.05	-2.3	75.8±2.2	p>0.05	-0.4	69.3±2.4	p>0.05	2018-04-06	60.2±2.5	p<0.01	2018-02-10	40.6±2.5	p<0.01	2018-06-11	30.5±2.3	p<0.01	2018-04-07	24.2±2.2	p>0.05	2018-02-06	10.9±1.6	p>0.05	2018-01-04	1.6±0.6	p>0.05	0.3	0±0	p>0.05	0
control	females	starvation	99.8±0.2			99±0.5			96.7±0.8			80.1±1.8			63.2±2.2			37.2±2.2			23.4±1.9			14.2±1.6			8.4±1.3			1.9±0.6			0.2±0.2			0±0
10 nM	females	starvation	99.7±0.3	p>0.05	0	99.7±0.3	p>0.05	0.8	98.7±0.6	p>0.05	2018-01-02	92.3±1.3	p<0.01	2018-02-12	73.4±2.2	p<0.01	2018-02-10	42.5±2.5	p>0.05	2018-02-05	18.4±2	p>0.05	-5	5.9±1.2	p<0.01	-8.3	1.3±0.6	p<0.01	-7.1	0±0	p<0.01	-1.9	0±0	p>0.05	-0.2	0±0	p>0.05	0
100 nM	females	starvation	99.7±0.3	p>0.05	-0.1	99.7±0.3	p>0.05	0.8	98.4±0.6	p>0.05	2018-08-01	88.2±1.7	p<0.01	8	68.4±2.4	p>0.05	2018-02-05	37.6±2.5	p>0.05	0.4	17.9±2	p>0.05	-5.5	10±1.5	p>0.05	-4.2	2.9±0.9	p<0.01	-5.5	1.1±0.5	p>0.05	-0.8	0.3±0.3	p>0.05	0.1	0±0	p>0.05	0
1 µM	females	starvation	100±0	p>0.05	0.2	98.9±0.5	p>0.05	0	97.8±0.8	p>0.05	2018-02-01	86.8±1.8	p<0.01	2018-07-06	67.2±2.4	p>0.05	4	32.5±2.4	p>0.05	-4.7	15.3±1.9	p<0.01	-8.1	8.6±1.5	p>0.05	-5.6	2.4±0.8	p>0.05	-5.9	0.8±0.5	p>0.05	-1.1	0.8±0.5	p>0.05	0.6	0±0	p>0.05	0
10 µM	females	starvation	99.5±0.4	p>0.05	-0.3	98.9±0.5	p>0.05	0	97.3±0.9	p>0.05	0.6	90.4±1.5	p<0.01	2018-03-10	78.1±2.2	p<0.01	2018-09-14	38.9±2.6	p>0.05	2018-07-01	20.5±2.1	p>0.05	-2.9	8.2±1.4	p>0.05	-6	4.4±1.1	p>0.05	-4	1.4±0.6	p>0.05	-0.5	0.5±0.4	p>0.05	0.3	0±0	p>0.05	0
100 µM	females	starvation	100±0	p>0.05	0.2	99.7±0.3	p>0.05	0.8	98.3±0.7	p>0.05	2018-07-01	90.8±1.5	p<0.01	2018-07-10	77.7±2.2	p<0.01	2018-05-14	53.5±2.6	p<0.01	2018-02-16	26.2±2.3	p>0.05	2018-08-02	11.4±1.7	p>0.05	-2.8	2.8±0.9	p>0.05	-5.6	1.1±0.6	p>0.05	-0.8	0±0	p>0.05	-0.2	0±0	p>0.05	0
1 mM	females	starvation	100±0	p>0.05	0.2	100±0	p>0.05	1	99.2±0.5	p>0.05	2018-05-02	93.9±1.3	p<0.01	2018-07-13	73.8±2.3	p<0.01	2018-06-10	40.4±2.6	p>0.05	2018-02-03	17.3±2	p<0.05	-6.2	5.6±1.2	p<0.01	-8.7	0.3±0.3	p<0.01	-8.1	0±0	p>0.05	-1.9	0±0	p>0.05	-0.2	0±0	p>0.05	0
10 mM	females	starvation	100±0	p>0.05	0.2	99.8±0.2	p>0.05	0.8	99.3±0.4	p>0.05	2018-07-02	88.9±1.5	p<0.01	2018-07-08	71.7±2.1	p<0.01	2018-05-08	46.8±2.4	p<0.01	2018-05-09	36.1±2.3	p<0.01	2018-06-12	29.8±2.2	p<0.01	2018-06-15	25.8±2.1	p<0.01	2018-05-17	8.7±1.3	p<0.01	2018-08-06	3.8±0.9	p<0.01	2018-06-03	0±0	p>0.05	0
100 mM	females	starvation	100±0	p>0.05	0.2	99.8±0.2	p>0.05	0.8	99.4±0.4	p>0.05	2018-07-02	92.8±1.2	p<0.01	2018-07-12	79±1.9	p<0.01	2018-08-15	53±2.3	p<0.01	2018-07-15	37.1±2.2	p<0.01	2018-06-13	25.8±2	p<0.01	2018-06-11	18.9±1.8	p<0.01	2018-05-10	3.4±0.8	p>0.05	2018-05-01	0.8±0.4	p>0.05	0.6	0±0	p>0.05	0
control	males	hyperthermia	100±0			100±0			99.8±0.2			99.8±0.2			99.3±0.4			97.3±0.8			95.1±1.1			69.1±2.3			51.6±2.5			30.2±2.3			24.6±2.1			17.5±1.9			15.6±1.8			9.7±1.5			7.8±1.3			1.5±0.6
10 nM	males	hyperthermia	100±0	p>0.05	0	100±0	p>0.05	0	99.7±0.3	p>0.05	0	99±0.5	p>0.05	-0.8	98.4±0.6	p>0.05	-0.8	92.2±1.4	p<0.01	-5.1	87±1.7	p<0.01	-8.1	61.6±2.5	p>0.05	-7.5	40.5±2.5	p<0.01	-11.1	19.7±2	p<0.01	-10.4	16.1±1.9	p<0.01	-8.5	12.7±1.7	p>0.05	-4.8	9.1±1.5	p<0.01	-6.5	6.5±1.3	p>0.05	-3.2	4.4±1	p>0.05	-3.4	1.6±0.6	p>0.05
100 nM	males	hyperthermia	100±0	p>0.05	0	100±0	p>0.05	0	100±0	p>0.05	0.2	99.7±0.3	p>0.05	0	99.7±0.3	p>0.05	0.5	90.8±1.5	p<0.01	-6.6	80.2±2	p<0.01	-14.9	59.6±2.5	p<0.01	-9.5	43±2.5	p<0.01	-8.6	22.4±2.1	p<0.01	-7.7	14±1.8	p<0.01	-10.6	11.6±1.6	p<0.01	-5.9	10.6±1.6	p>0.05	-5	6.9±1.3	p>0.05	-2.9	5±1.1	p>0.05	-2.8	1.6±0.6	p>0.05
1 µM	males	hyperthermia	100±0	p>0.05	0	100±0	p>0.05	0	100±0	p>0.05	0.2	99.5±0.4	p>0.05	-0.3	98.4±0.6	p>0.05	-0.9	90.5±1.5	p<0.01	-6.8	78.3±2.1	p<0.01	-16.8	52.1±2.6	p<0.01	-17	38.9±2.5	p<0.01	-12.7	14.8±1.8	p<0.01	-15.4	12.2±1.7	p<0.01	-12.4	9.5±1.5	p<0.01	-8	6.6±1.3	p<0.01	-9	4±1	p<0.01	-5.8	2.4±0.8	p<0.01	-5.4	0.5±0.4	p>0.05
10 µM	males	hyperthermia	100±0	p>0.05	0	99.7±0.3	p>0.05	-0.3	99.7±0.3	p>0.05	0	98.5±0.6	p>0.05	-1.2	98.3±0.7	p>0.05	-1	92.1±1.5	p<0.01	-5.2	76.4±2.3	p<0.01	-18.7	42.9±2.7	p<0.01	-26.2	29.4±2.5	p<0.01	-22.1	16±2	p<0.01	-14.1	10.5±1.7	p<0.01	-14.1	6.7±1.4	p<0.01	-10.8	6.1±1.3	p<0.01	-9.4	4.4±1.1	p<0.01	-5.4	4.4±1.1	p>0.05	-3.4	0.9±0.5	p>0.05
100 µM	males	hyperthermia	99.7±0.3	p>0.05	-0.3	99.4±0.4	p>0.05	-0.6	99.4±0.4	p>0.05	-0.4	98.8±0.6	p>0.05	-1	98.5±0.7	p>0.05	-0.8	90.7±1.6	p<0.01	-6.6	83.3±2.1	p<0.01	-11.8	55.2±2.8	p<0.01	-13.9	34.9±2.6	p<0.01	-16.7	18.5±2.2	p<0.01	-11.7	9.6±1.6	p<0.01	-15	5.2±1.2	p<0.01	-12.3	3.4±1	p<0.01	-12.2	1.2±0.6	p<0.01	-8.5	0.6±0.4	p<0.01	-7.2	0.3±0.3	p>0.05
1 mM	males	hyperthermia	100±0	p>0.05	0	99.7±0.3	p>0.05	-0.3	99.7±0.3	p>0.05	0	99.2±0.4	p>0.05	-0.5	97.4±0.8	p<0.05	-1.9	89.3±1.6	p<0.01	-8	78.6±2.1	p<0.01	-16.5	46.6±2.5	p<0.01	-22.5	30.2±2.3	p<0.01	-21.4	14.1±1.8	p<0.01	-16.1	7.6±1.3	p<0.01	-17	6.5±1.3	p<0.01	-11	5.2±1.1	p<0.01	-10.4	4.2±1	p<0.01	-5.6	3.1±0.9	p<0.01	-4.7	0.8±0.4	p>0.05
10 mM	males	hyperthermia	99.7±0.3	p>0.05	-0.3	99.7±0.3	p>0.05	-0.3	99.7±0.3	p>0.05	0	99.2±0.4	p>0.05	-0.5	98.2±0.7	p>0.05	-1.1	94±1.2	p<0.01	-3.3	86.8±1.7	p<0.01	-8.4	55.8±2.5	p<0.01	-13.3	40.8±2.5	p<0.01	-10.8	20.3±2	p<0.01	-9.9	11.4±1.6	p<0.01	-13.1	9.6±1.5	p<0.01	-7.9	7.3±1.3	p<0.01	-8.3	3.9±1	p<0.01	-5.8	1.6±0.6	p<0.01	-6.2	0.8±0.4	p>0.05
100 mM	males	hyperthermia	100±0	p>0.05	0	100±0	p>0.05	0	100±0	p>0.05	0.2	99.5±0.4	p>0.05	-0.3	99.2±0.5	p>0.05	-0.1	96.6±0.9	p>0.05	-0.8	92.6±1.4	p>0.05	-2.6	62.3±2.5	p<0.05	-6.8	42.2±2.5	p<0.01	-9.4	24.1±2.2	p<0.05	-6	17.2±1.9	p<0.01	-7.3	12.2±1.7	p<0.05	-5.3	10.1±1.6	p<0.01	-5.5	7.2±1.3	p>0.05	-2.6	6.1±1.2	p>0.05	-1.7	1.6±0.6	p>0.05
control	females	hyperthermia	99.8±0.2			99.6±0.3			99.6±0.3			99.6±0.3						98.4±0.6			97.8±0.7			81.7±1.7			69.7±2.1			54.5±2.2			40.7±2.2			28.3±2			22.8±1.9			9.3±1.3			5.9±1.1			1.8±0.6
10 nM	females	hyperthermia	100±0	p>0.05	0.2	100±0	p<0.05	0.4	99.8±0.2	p>0.05	0.2	99.8±0.2	p>0.05	0.2	99.6±0.3	p>0.05	0.2	97.2±0.8	p>0.05	-1.2	95.7±0.9	p>0.05	-2.1	74.4±2	p<0.01	-7.3	55.5±2.3	p<0.01	-14.2	33.6±2.2	p<0.01	-20.8	14.5±1.6	p<0.01	-26.1	10.2±1.4	p<0.01	-18.1	5.9±1.1	p<0.01	-16.9	0.7±0.4	p<0.01	-8.7	0.4±0.3	p<0.01	-5.5	0.2±0.2	p<0.01
100 nM	females	hyperthermia	99.6±0.3	p>0.05	-0.2	99.4±0.4	p>0.05	-0.2	99.2±0.4	p>0.05	-0.4	98.8±0.5	p>0.05	-0.8	98.6±0.5	p>0.05	-0.8	92.9±1.2	p<0.01	-5.5	90±1.4	p<0.01	-7.7	65.8±2.1	p<0.01	-15.9	48.7±2.3	p<0.01	-21	25.3±2	p<0.01	-29.2	11.6±1.4	p<0.01	-29	6.1±1.1	p<0.01	-22.1	4.7±1	p<0.01	-18.1	1.8±0.6	p<0.01	-7.5	1.8±0.6	p<0.01	-4.1	1±0.5	p>0.05
1 µM	females	hyperthermia	100±0	p>0.05	0.2	99.8±0.2	p>0.05	0.2	99.8±0.2	p>0.05	0.2	99.8±0.2	p>0.05	0.2	98.8±0.5	p>0.05	-0.6	91.5±1.3	p<0.01	-6.9	87.4±1.5	p<0.01	-10.4	64.8±2.2	p<0.01	-16.9	43.1±2.2	p<0.01	-26.6	24±1.9	p<0.01	-30.5	12±1.5	p<0.01	-28.7	6.9±1.1	p<0.01	-21.3	4.7±1	p<0.01	-18.1	1.2±0.5	p<0.01	-8.1	0.6±0.4	p<0.01	-5.3	0.2±0.2	p>0.05
10 µM	females	hyperthermia	99.4±0.4	p>0.05	-0.4	99.4±0.4	p>0.05	-0.2	98.9±0.5	p>0.05	-0.6	98.5±0.6	p>0.05	-1.1	96.6±0.8	p<0.01	-2.8	87.6±1.5	p<0.01	-10.8	82.7±1.7	p<0.01	-15	57.7±2.3	p<0.01	-24	34.9±2.2	p<0.01	-34.8	17.3±1.7	p<0.01	-37.2	9.3±1.3	p<0.01	-31.4	5.5±1	p<0.01	-22.8	4.2±0.9	p<0.01	-18.6	1.1±0.5	p<0.01	-8.3	0.8±0.4	p<0.01	-5.1	0.4±0.3	p>0.05
100 µM	females	hyperthermia	100±0	p>0.05	0.2	99.5±0.3	p>0.05	-0.1	99.5±0.3	p>0.05	-0.1	99.1±0.5	p>0.05	-0.5	95.4±1	p<0.01	-4	84.5±1.7	p<0.01	-13.9	78.7±2	p<0.01	-19.1	53±2.4	p<0.01	-28.7	36.1±2.3	p<0.01	-33.6	11.6±1.5	p<0.01	-42.9	5.6±1.1	p<0.01	-35.1	3±0.8	p<0.01	-25.2	1.9±0.6	p<0.01	-20.9	0.7±0.4	p<0.01	-8.7	0.2±0.2	p<0.01	-5.7	0±0	p>0.05
1 mM	females	hyperthermia	100±0	p>0.05	0.2	99.4±0.4	p>0.05	-0.2	99.4±0.4	p>0.05	-0.2	98.5±0.6	p>0.05	-1.1	96.6±0.8	p<0.01	-2.8	88.4±1.5	p<0.01	-10	81.5±1.8	p<0.01	-16.3	56.4±2.3	p<0.01	-25.3	38.1±2.2	p<0.01	-31.6	20±1.8	p<0.01	-34.5	12.2±1.5	p<0.01	-28.4	6.1±1.1	p<0.01	-22.1	4.4±0.9	p<0.01	-18.3	1.5±0.6	p<0.01	-7.9	1.1±0.5	p<0.01	-4.8	0.2±0.2	p>0.05
10 mM	females	hyperthermia	100±0	p>0.05	0.2	99.8±0.2	p>0.05	0.2	99.6±0.3	p>0.05	0	99.6±0.3	p>0.05	0	98.5±0.6	p>0.05	-0.9	92.2±1.2	p<0.01	-6.1	77.8±1.9	p<0.01	-20	54.3±2.3	p<0.01	-27.4	41.3±2.3	p<0.01	-28.4	27.5±2	p<0.05	-27	16.1±1.7	p<0.01	-24.5	9.2±1.3	p<0.01	-19	6.9±1.2	p<0.01	-15.8	3.1±0.8	p<0.01	-6.2	1.3±0.5	p<0.01	-4.6	0.2±0.2	p>0.05
100 mM	females	hyperthermia	99.8±0.2	p>0.05	0	99.6±0.3	p>0.05	0	99.6±0.3	p>0.05	0	99.6±0.3	p>0.05	0	98.7±0.5	p>0.05	-0.6	94.8±1	p<0.01	-3.6	84.1±1.7	p<0.01	-13.7	75.3±2	p<0.01	-6.4	54.6±2.3	p<0.01	-15.1	40.8±2.2	p<0.01	-13.7	29.7±2.1	p<0.01	-10.9	20.9±1.9	p<0.01	-7.3	13.8±1.6	p<0.01	-9	6.3±1.1	p<0.05	-3.1	4.6±1	p>0.05	-1.3	1±0.5	p>0.05
			dS - differences between survival of control and experimental flies
			N - number of repetitions
			n - number of flies
[truncated: 15 more columns]
