# Supplementary material for: Effects of N-acetyl-L-cysteine on lifespan, locomotor activity and stress-resistance of 3 Drosophila species with different lifespans
Source: Aging (Albany NY). 2018 Sep 20;10(9):2428–58. doi: 10.18632/aging.101561 (PMC6188487; doi:10.18632/aging.101561)
Supplement: Supplementary Table S6 [file aging-10-101561-s005.xlsx]

## Sheet: D. kikkawai
Supplementary Table S6. Influence of NAC treatment on D. kikkawai resistance to paraquat, starvation and hyperthermia
										Survival (%) at time (h)
			12	ϕ-Fisher	dS	24	ϕ-Fisher	dS	36	ϕ-Fisher	dS	48	ϕ-Fisher	dS	60	ϕ-Fisher	dS	72	ϕ-Fisher	dS	N	n
concentration	sex	stress factor
control	males	paraquat	44.8±3.4			0±0			0±0												3	210
10 nM	males	paraquat	50.3±4	p>0.05	2018-06-05	0±0	p>0.05	0	0±0	p>0.05	0										3	159
100 nM	males	paraquat	63.1±4.1	p<0.01	2018-04-18	0±0	p>0.05	0	0±0	p>0.05	0										3	141
1 µM	males	paraquat	59.3±3.9	p<0.01	2018-05-14	0±0	p>0.05	0	0±0	p>0.05	0										3	162
10 µM	males	paraquat	55.1±3.5	p<0.05	2018-04-10	0±0	p>0.05	0	0±0	p>0.05	0										3	205
100 µM	males	paraquat	63.2±4.2	p<0.01	2018-04-18	0±0	p>0.05	0	0±0	p>0.05	0										3	133
1 mM	males	paraquat	63.5±3.8	p<0.01	2018-08-18	0±0	p>0.05	0	0±0	p>0.05	0										3	159
10 mM	males	paraquat	57.4±3.3	p<0.01	2018-06-12	0.9±0.6	p>0.05	0.9	0±0	p>0.05	0										3	223
100 mM	males	paraquat	53.3±4.5	p>0.05	2018-05-08		p>0.05	0	0±0	p>0.05	0										3	122
control	females	paraquat	98.9±0.7			1.5±0.8			0±0			0±0									3	261
10 nM	females	paraquat	98.1±0.8	p>0.05	-0.8	1.6±0.7	p>0.05	0.1	0±0	p>0.05	0	0±0	p>0.05	0							3	309
100 nM	females	paraquat	99.1±0.5	p>0.05	0.2	1.8±0.7	p>0.05	0.3	0.3±0.3	p>0.05	0.3	0±0	p>0.05	0							3	327
1 µM	females	paraquat	95.2±1.2	p<0.01	-3.6	0.3±0.3	p>0.05	-1.2	0±0	p>0.05	0	0±0	p>0.05	0							3	313
10 µM	females	paraquat	97.2±0.9	p>0.05	-1.7	4.4±1.1	p>0.05	2018-09-02	0.6±0.4	p>0.05	0.6	0±0	p>0.05	0							3	319
100 µM	females	paraquat	96.9±1.2	p>0.05	-2	0±0	p>0.05	-1.5	0±0	p>0.05	0	0±0	p>0.05	0							3	225
1 mM	females	paraquat	99±0.7	p>0.05	0.2	1.9±0.9	p>0.05	0.4	1±0.7	p>0.05	1	0±0	p>0.05	0							3	209
10 mM	females	paraquat	98±0.8	p>0.05	-0.8	1.3±0.6	p>0.05	-0.2	0±0	p>0.05	0	0±0	p>0.05	0							3	306
100 mM	females	paraquat	96.8±1.1	p>0.05	-2.1	1.1±0.6	p>0.05	-0.5	0±0	p>0.05	0	0±0	p>0.05	0							3	279
control	males	starvation	43.1±2.9			3.5±1.1			0.4±0.4			0±0									3	283
10 nM	males	starvation	30.5±3.7	p<0.01	-12.6	2.6±1.3	p>0.05	-0.9	0±0	p>0.05	-0.4	0±0	p>0.05								3	154
100 nM	males	starvation	28.4±3.7	p<0.01	-14.7	5.4±1.9	p>0.05	2018-09-01	0±0	p>0.05	-0.4	0±0	p>0.05								3	148
1 µM	males	starvation	30.7±3.6	p<0.01	-12.4	2.4±1.2	p>0.05	-1.1	0±0	p>0.05	-0.4	0±0	p>0.05								3	166
10 µM	males	starvation	33.8±3.3	p<0.05	-9.3	1.5±0.9	p>0.05	-2	0±0	p>0.05	-0.4	0±0	p>0.05								3	201
100 µM	males	starvation	55.1±3.5	p<0.01	2018-09-11	11.1±2.2	p<0.01	2018-06-07	3±1.2	p>0.05	2018-07-02	0±0	p>0.05								3	198
1 mM	males	starvation	45.5±3.5	p>0.05	2018-04-02	7±1.8	p<0.05	2018-05-03	2±1	p>0.05	2018-06-01	0±0	p>0.05								3	200
10 mM	males	starvation	39.9±3.5	p>0.05	-3.2	1.6±0.9	p>0.05	-2	1.6±0.9	p>0.05	2018-02-01	0±0	p>0.05								3	193
100 mM	males	starvation	36.6±3.8	p>0.05	-6.5	4.3±1.6	p>0.05	0.7	0±0	p>0.05	-0.4	0±0	p>0.05								3	164
control	females	starvation	93.1±1.3			75.6±2.2			41.2±2.5			26±2.2			21.1±2.1			0±0			3	393
10 nM	females	starvation	91.8±1.7	p>0.05	-1.3	66±2.9	p<0.01	-9.5	18.7±2.4	p<0.01	-22.6	1.5±0.7	p<0.01	-24.5	0±0	p<0.01	-21.1	0±0	p>0.05	0	3	268
100 nM	females	starvation	90.2±1.8	p>0.05	-2.9	62.6±2.9	p<0.01	-13	10.5±1.8	p<0.01	-30.7	1.4±0.7	p<0.01	-24.6	0±0	p<0.01	-21.1	0±0	p>0.05	0	3	286
1 µM	females	starvation	79.5±2.4	p<0.01	-13.6	54.9±2.9	p<0.01	-20.7	21.2±2.4	p<0.01	-20	5.2±1.3	p<0.01	-20.7	0±0	p>0.05	-21.1	0±0	p>0.05	0	3	288
10 µM	females	starvation	86.9±2.2	p<0.01	-6.2	57.2±3.3	p<0.01	-18.4	17.9±2.5	p<0.01	-23.3	3.5±1.2	p<0.01	-22.5	0±0	p<0.01	-21.1	0±0	p>0.05	0	3	229
100 µM	females	starvation	91.6±1.8	p>0.05	-1.5	65.2±3	p<0.01	-10.4	15.6±2.3	p<0.01	-25.6	4.4±1.3	p<0.01	-21.6	0±0	p<0.01	-21.1	0±0	p>0.05	0	3	250
1 mM	females	starvation	81.4±2.4	p<0.01	-11.7	50±3.1	p<0.01	-25.6	13.6±2.1	p<0.01	-27.7	5±1.4	p<0.01	-20.9	0±0	p<0.01	-21.1	0±0	p>0.05	0	3	258
10 mM	females	starvation	86.2±1.7	p<0.01	-7	72.8±2.2	p>0.05	-2.8	27.7±2.2	p<0.01	-13.5	14.6±1.7	p<0.01	-11.4	3.3±0.9	p<0.01	-17.8	0±0	p>0.05	0	3	419
100 mM	females	starvation	82.5±2	p<0.01	-10.6	57.1±2.6	p<0.01	-18.5	11.6±1.7	p<0.01	-29.6	6.1±1.3	p<0.01	-19.9	0±0	p<0.01	-21.1	0±0	p>0.05	0	3	361
control	males	hyperthermia	64.3±2.5			26.7±2.3			1.9±0.7			1.3±0.6			0±0			0±0			3	375
10 nM	males	hyperthermia	75.7±2.4	p<0.01	2018-04-11	24.9±2.4	p>0.05	-1.7	4.2±1.1	p>0.05	2018-03-02	1.2±0.6	p>0.05	-0.1	0.3±0.3	p>0.05	0.3	0±0	p>0.05	0	3	333
100 nM	males	hyperthermia	76.7±2.1	p<0.01	2018-04-12	31.3±2.3	p>0.05	2018-07-04	4±1	p>0.05	2018-01-02	2.5±0.8	p>0.05	2018-02-01	0.5±0.4	p>0.05	0.5	0±0	p>0.05	0	3	399
1 µM	males	hyperthermia	80.5±2	p<0.01	2018-02-16	34.1±2.4	p>0.05	2018-04-07	4.3±1	p>0.05	2018-04-02	3.3±0.9	p>0.05	2018-09-01	0.8±0.4	p>0.05	0.8	0±0	p>0.05	0	3	399
10 µM	males	hyperthermia	81.8±1.9	p<0.01	2018-05-17	36.2±2.4	p<0.01	2018-05-09	6.7±1.3	p<0.01	2018-09-04	4±1	p>0.05	2018-07-02	1±0.5	p>0.05	1	0±0	p>0.05	0	3	401
100 µM	males	hyperthermia	85.7±1.8	p<0.01	2018-04-21	38.1±2.5	p<0.01	2018-04-11	6.8±1.3	p<0.01	2018-09-04	4.3±1.1	p<0.01	3	1.1±0.5	p>0.05	2018-01-01	0±0	p>0.05	0	3	370
1 mM	males	hyperthermia	78±2.2	p<0.01	2018-07-13	33.3±2.5	p<0.05	2018-07-06	8.1±1.5	p<0.01	2018-02-06	4.6±1.1	p<0.01	2018-03-03	1.7±0.7	p>0.05	2018-07-01	0±0	p>0.05	0	3	345
10 mM	males	hyperthermia	86.4±1.8	p<0.01	2018-01-22	35±2.5	p<0.01	2018-03-08	6.4±1.3	p<0.01	2018-05-04	4.2±1.1	p<0.01	2018-08-02	1.1±0.6	p>0.05	2018-01-01	0±0	p>0.05	0	3	360
100 mM	males	hyperthermia	94.5±1.2	p<0.01	2018-03-30	36.8±2.6	p<0.01	2018-01-10	6.9±1.4	p<0.01	5	2.9±0.9	p>0.05	2018-05-01	1.7±0.7	p>0.05	2018-07-01	0±0	p>0.05	0	3	348
control	females	hyperthermia	65.5±2.4			30±2.3			3.3±0.9			1.8±0.7			0±0			0±0			3	397
10 nM	females	hyperthermia	63.7±2.5	p>0.05	-1.8	26±2.3	p>0.05	-4	3.2±0.9	p>0.05	-0.1	2.7±0.8	p>0.05	0.9	0.5±0.4	p>0.05	0.5	0±0	p>0.05	0	3	377
100 nM	females	hyperthermia	66.7±2.3	p>0.05	2018-02-01	30.7±2.3	p>0.05	0.7	6±1.2	p>0.05	2018-07-02	3.1±0.8	p>0.05	2018-03-01	1±0.5	p>0.05	1	0±0	p>0.05	0	3	420
1 µM	females	hyperthermia	69.1±2.2	p>0.05	2018-06-03	33.2±2.3	p>0.05	2018-02-03	6.7±1.2	p<0.01	2018-04-03	3.5±0.9	p>0.05	2018-07-01	1.4±0.6	p>0.05	2018-04-01	0±0	p>0.05	0	3	434
10 µM	females	hyperthermia	72.6±2.2	p<0.05	2018-01-07	34.4±2.3	p>0.05	2018-04-04	5.6±1.1	p>0.05	2018-03-02	3.7±0.9	p>0.05	2	1.2±0.5	p>0.05	2018-02-01	0±0	p>0.05	0	3	430
100 µM	females	hyperthermia	75.8±2.1	p<0.01	2018-03-10	28.7±2.3	p>0.05	-1.3	9.1±1.4	p<0.01	2018-08-05	6±1.2	p<0.01	2018-03-04	2.8±0.8	p>0.05	2018-08-02	0±0	p>0.05	0	3	397
1 mM	females	hyperthermia	73.2±2.3	p<0.01	2018-07-07	32.6±2.4	p>0.05	2018-06-02	12.5±1.7	p<0.01	2018-02-09	7.6±1.3	p<0.01	2018-08-05	3.1±0.9	p<0.01	2018-01-03	0±0	p>0.05	0	3	384
10 mM	females	hyperthermia	80.3±2	p<0.01	2018-08-14	33.2±2.3	p>0.05	2018-02-03	11.3±1.6	p<0.01	8	9.4±1.4	p<0.01	2018-06-07	2.6±0.8	p<0.01	2018-06-02	0±0	p>0.05	0	3	416
100 mM	females	hyperthermia	88.6±1.6	p<0.01	2018-01-23	31.1±2.3	p>0.05	2018-01-01	14.4±1.8	p<0.01	2018-01-11	8.8±1.4	p<0.01	2018-01-07	3.5±0.9	p<0.01	2018-05-03	0±0	p>0.05	0	3	396
			dS - differences between survival of control and experimental flies
			N - number of repetitions
			n - number of flies
